# Supplementary material
Source: Springer Nature journal article supplement (https://www.springermedizin.de/resource/supplementary/13012_2013_631_MOESM2_ESM.pdf/9630398)
Supplement: MOESM2 [file 9630398]

## Research Centers

- Center for Health Enhancement System Studies [CHESS], University of Wisconsin, Madison, WI
- State of Ohio Department of Alcohol and Drug Addiction's Division of Planning, Outcomes, and Research
- Center for Substance Abuse Research and Policy, Oregon Health & Science University, Portland, OR.

Fourteen State of Ohio Alcohol,  
Drug Addiction, and Mental  
Health County Boards

Study Intervention

1. NIATx-Only  
(7 Boards & 25 Treatment  
Organizations)

- Kick-off learning session
- Monthly coach calls for treatment organizations only

2. Advancing Recovery  
(7 Boards & 25 Treatment  
Organizations)

- Three partnering learning sessions
- One partnering site visit
- Monthly coach calls county boards and treatment organizations
